# Supplementary material for: Benzimidazolium ionic liquid tagged phenazine salophen as a bifunctional ‘off–on’ PET based fluorescent sensor for aqueous phase detection of trinitrotoluene and picric acid
Source: Royal Society of Chemistry journal article supplement (doi:10.1039/d2tc00131d), 2022-01-01
Supplement: d2tc00131d1.pdf [file d2tc00131d1.pdf]

## Electronic supplementary information (ESI)

Benzimidazolium ionic liquid tagged phenazine salophen as  
bifunctional 'off-on' PET based fluorescent sensor for aqueous  
phase detection of trinitrotoluene and picric acid

*Jonnagaddala Harathi, Ramasamy Selva Kumar, Somanahalli Kalleshappa Ashok Kumar,  
Duraishamy Saravanakumar, Sellappan Senthilkumar\* and Kathavarayan Thenmozhi\**

Department of Chemistry, School of Advanced Sciences, Vellore Institute of Technology (VIT),  
Vellore-632014, India.

\*Corresponding Authors:

Email: kt.thenmozhi@gmail.com; k.thenmozhi@vit.ac.in (Kathavarayan Thenmozhi)

Email: senthilanalytical@gmail.com; senthilkumar.s@vit.ac.in (Sellappan Senthilkumar)

## EXPERIMENTAL SECTION

### Chemicals

Potassium bromide, o-phenylenediamine, salicylaldehyde, formaldehyde (Sigma, 37%), zinc chloride (Alfa, 99.99%), sodium hydride (60% dispersion in mineral oil), benzimidazole, 1-bromoethane and all nitro compounds used in the present work were purchased from Sigma-Aldrich. 2,4,6-TNT (250 mg) was prepared according to the reported procedure<sup>1</sup> from 2,4-DNT in small quantities. *Caution:* Since TNT and other nitroaromatics used in the present study are highly explosive, they should be handled in small quantities to avoid risks. All the chemicals and reagents were of analytical grade and used without any purification unless otherwise specified. Aqueous solutions were prepared using deionized water collected from Millipore water purification (18.2 MΩ cm at 25 °C) technique. Aqueous stock solutions of PS-IL (1.0 mM) and nitro compounds (1.0 mM) used in the present study were prepared by dissolving the necessary amount of corresponding compounds in water under sonication.

### Characterization

Nuclear magnetic resonance (NMR) spectra were recorded on Avance Bruker 400 MHz spectrometer (TMS as internal reference). Mass spectral data were recorded using Waters high resolution Q-TOF mass spectrometer. Fourier transform infrared spectra (IR) were recorded using Shimadzu Affinity FT-IR spectrometer with attenuated total reflectance (ATR) setup within the range of 4000-400 cm<sup>-1</sup>. UV-Visible absorption spectra were recorded using Jasco 4100 (UV-VIS-NIR-V-670) spectrophotometer. Fluorescence spectra were recorded with a Hitachi (F-7000FL) spectrophotometer. Electrospun (ES) nanofibers were collected from Espin nano, India, with the capacity of 60 kV using H<sub>2</sub>O as solvent. The morphology of electrospun nanofibers was obtained using FEI Quanta 250 FEG field emission-scanning electron microscope (FE-SEM). Fluorescence lifetime measurements were recorded with a HORIBA

Jobin-Yvon spectrofluorometer. The mechanistic pathway of the sensor was studied theoretically using density functional theory (DFT) and the calculations were performed on Gaussian 09 program.

### **Synthesis of 5-(chloromethyl)-2-hydroxybenzaldehyde (1)**

The synthesis of 5-(chloromethyl)-2-hydroxybenzaldehyde was carried out with a slight modification using the earlier reported procedure<sup>2</sup>. In a round bottom flask containing 25 mL of conc. HCl, 6 mL of formaldehyde (37 wt% H<sub>2</sub>O) and 40 mmol of salicylaldehyde (4.884 g) was added along with 0.3 g of ZnCl<sub>2</sub>. The resulting mixture was allowed to stir at room temperature for 24 h under N<sub>2</sub> atmosphere, which forms a pink coloured precipitate. Thus, obtained precipitate was separated out and washed with several times of water to remove the unreacted reactants from the product. Finally, the resultant crude product was recrystallized using hot n-hexane, which forms the desired product (**1**) as white solid. Yield: 52%, M.P: 84 °C. <sup>1</sup>H NMR (400 MHz, DMSO-*d*<sub>6</sub>) δ: 4.73 (s, 2H), 7.02 (d, 1H), 7.57 (d, 1H), 7.70 (s, 1H), 10.25 (s, 1H), 10.92 (s, 1H). <sup>13</sup>C NMR (100 MHz, DMSO-*d*<sub>6</sub>) δ: 46.22, 117.53, 122.25, 127.22, 133.98, 135.44, 160.25, 192.04. GC-MS *m/z* calculated for [M<sup>+</sup>] [C<sub>8</sub>H<sub>7</sub>ClO<sub>2</sub>]<sup>+</sup> 170.5910 and found 170.5955.

### **Synthesis of 1-ethyl-1H-benzimidazole (2)**

To synthesize 1-ethyl-1H-benzimidazole, we have followed earlier reported procedure with a minor modification<sup>3</sup>. Benzimidazole (5.907 g, 50 mmol) in 75 mL of dry THF was added dropwise to a stirring THF (10 mL) solution of oil free NaH (2 g, 50 mmol) and refluxed at 60 °C for 2 h. Thereafter, THF (15 mL) solution of bromoethane (5.44 g, 50 mmol) was added dropwise and continued to stir at 60 °C for another 48 h. After completion, the reaction mixture was filtered off to remove the formed sodium bromide and the resulting solution was subjected to rotary evaporation. Thus, obtained yellowish brown liquid was redissolved in

chloroform and then washed with copious amount of deionized water. Thereafter, the organic layer was separated from water and dried over Na<sub>2</sub>SO<sub>4</sub>. Finally, chloroform was removed under reduced pressure to obtain **(2)** as a pale yellow liquid with 95% yield. <sup>1</sup>H NMR (400 MHz, DMSO-*d*<sub>6</sub>) δ: 1.36 (t, *J*=7.7 Hz, 3H), 4.26 (q, *J*=7.2, 2H), 7.20 (d, *J*=1.6, 2H), 7.25 (d, 1H), 7.60 (d, *J*=7.6, 1H), 8.25 (d, 1H). <sup>13</sup>C NMR (100 MHz, DMSO-*d*<sub>6</sub>) δ: 15.64, 79.69, 110.71, 119.92, 121.89, 122.67, 134.04, 143.92, 144.04. GC-MS *m/z* calculated for [M<sup>+</sup>] [C<sub>9</sub>H<sub>10</sub>N<sub>2</sub>]<sup>+</sup> 146.19 and found 146.20.

### Synthesis of 1-ethyl-3-(3-formyl-4-hydroxybenzyl)-1H-benzimidazol-3-ium chloride (**3**)

The mixture of compound 1 (2.922 g, 20 mmol) and compound 2 (3.4 g, 20 mmol) was dissolved in acetonitrile and then the reaction mixture was refluxed under 70 °C for 24 h. The resulting reaction mixture was allowed to cool at room temperature and then the obtained precipitate was filtered and washed with ethyl acetate (3 × 50 mL) followed by diethyl ether (2 × 50 mL). The product was obtained as white solid **(3)**. Yield: 6.01 g, 96%. M.P: 243 °C. <sup>1</sup>H NMR (400 MHz, DMSO-*d*<sub>6</sub>) δ: 1.54 (t, *J*=7.20 Hz, 3H), 4.52 (q, *J*=7.20 Hz, 2H), 5.71(s, 2H), 7.16 (d, *J*=8.80 Hz, 2H), 7.64-7.73 (m, 3H), 7.99 (d, *J*=2.0 Hz, 1H), 8.09-8.10 (m, 1H), 8.11 (d, *J*=2.0 Hz, 1H), 10.05 (s, 1H), 10.27 (s, 1H), 11.20 (s, 1H). <sup>13</sup>C NMR (100 MHz, DMSO-*d*<sub>6</sub>) δ: 14.55, 42.67, 49.62, 114.30, 114.33, 118.60, 122.97, 125.17, 127.04, 127.13, 129.22, 131.32, 131.65, 136.96, 142.56, 161.69, 190.79.

### Synthesis of 1-ethyl-3-(3-formyl-4-hydroxybenzyl)-1H-benzimidazol-3-ium bromide (**4**)

A mixture of potassium bromide (2.38 g, 20 mmol) in absolute ethanol was added dropwise to an ethanolic solution of compound 3 (3.16 g, 10 mmol) at room temperature for 12 h and filtered. The solvent was removed under reduced pressure and the obtained solid was washed with diethyl ether (3 × 50 mL), gives pale yellow solid **(4)** with 80% yield. M.P:

245 °C ,  $^1\text{H}$  NMR (400 MHz,  $\text{DMSO-}d_6$ )  $\delta$ : 1.56 (t,  $J=7.2$  Hz, 3H), 4.54 (q,  $J=7.2$  Hz, 2H), 5.73 (s, 2H), 7.11 (d,  $J=8.4$  Hz, 1H), 7.66-7.68 (m, 2H), 7.74 (q,  $J=2.0$  Hz, 1H), 7.88 (d,  $J=2.0$  Hz, 1H), 7.98 (q,  $J=3.2$  Hz, 1H), 8.07 (q,  $J=1.2$  Hz, 1H), 10.05 (s, 1H), 10.25 (s, 1H), 11.09 (s, 1H).  $^{13}\text{C}$  NMR (100 MHz,  $\text{DMSO-}d_6$ )  $\delta$ : 14.54, 42.71, 49.60, 119.29, 119.31, 118.52, 122.87, 125.26, 127.05, 127.13, 129.43, 131.25, 131.61, 137.05, 142.46, 161.54, and 191.05.

### Synthesis of 2,3-Diaminophenazine (5)

2,3-diaminophenazine was prepared according to the previous reported procedure<sup>4</sup>. 12 mL of 0.16 mol/L aqueous  $\text{FeCl}_3$  solution was added to 60 mL of 0.04 mol/L aqueous o-phenylenediamine under continuous stirring at room temperature. A fast colour change from purple black to red-brown was observed with the addition of  $\text{FeCl}_3$ . After 6 h, the obtained solid was filtered and washed with water ( $4 \times 20$  mL). The product (**5**) was yielded (95%) as brown solid. M.P: 300 °C.  $^1\text{H}$  NMR (400 MHz,  $\text{DMSO-}d_6$ )  $\delta$ : 6.95 (s, 2H), 7.32 (s, 4H), 7.63 (s, 2H), 7.94 (s, 2H).  $^{13}\text{C}$  NMR (100 MHz,  $\text{DMSO-}d_6$ )  $\delta$ : 99.35, 125.33, 128.31, 136.04, 140.49 and 147.36. GC-MS:  $m/z$  calculated for  $[\text{M}^+]$   $[\text{C}_{12}\text{H}_{10}\text{N}_4]^+$  as 210.24; found : 210.21.

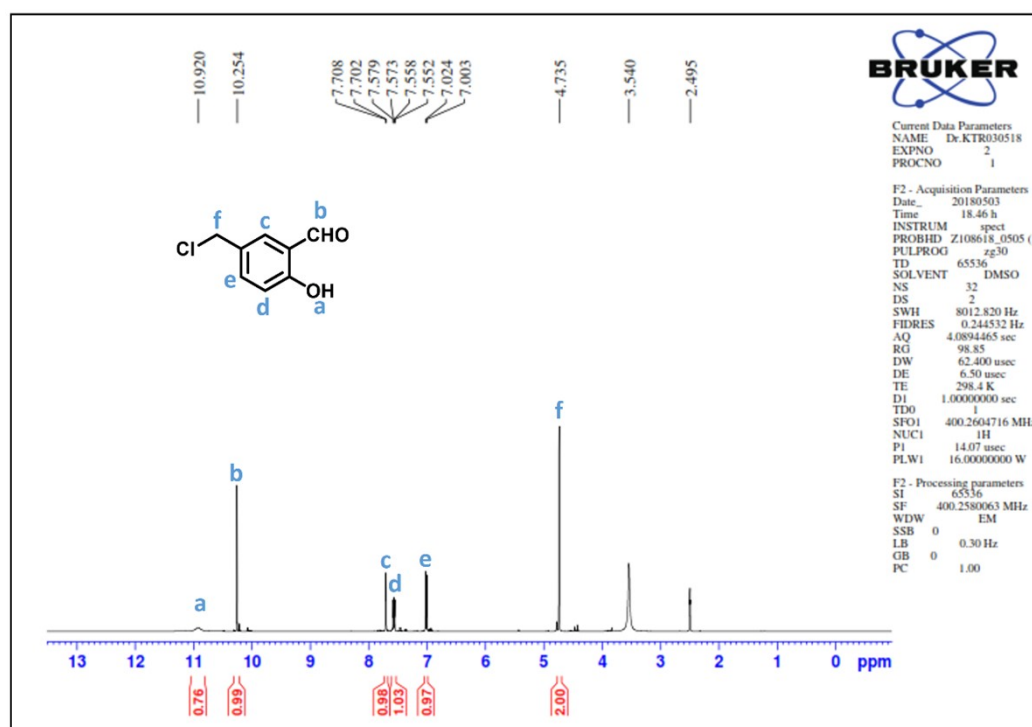

**Fig. S1**  $^1\text{H}$  NMR spectrum of 5-chloromethyl-2-hydroxybenzaldehyde (**1**)

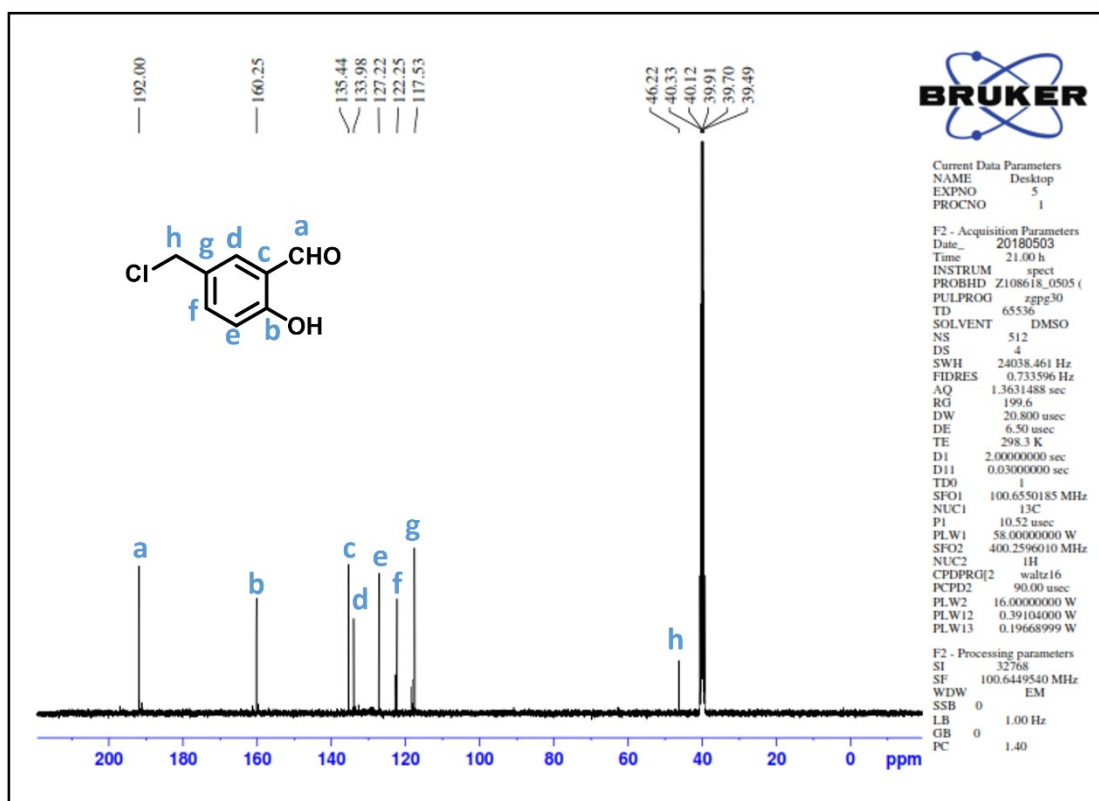

Fig. S2 <sup>13</sup>C NMR spectrum of 5-chloromethyl-2-hydroxybenzaldehyde (1)

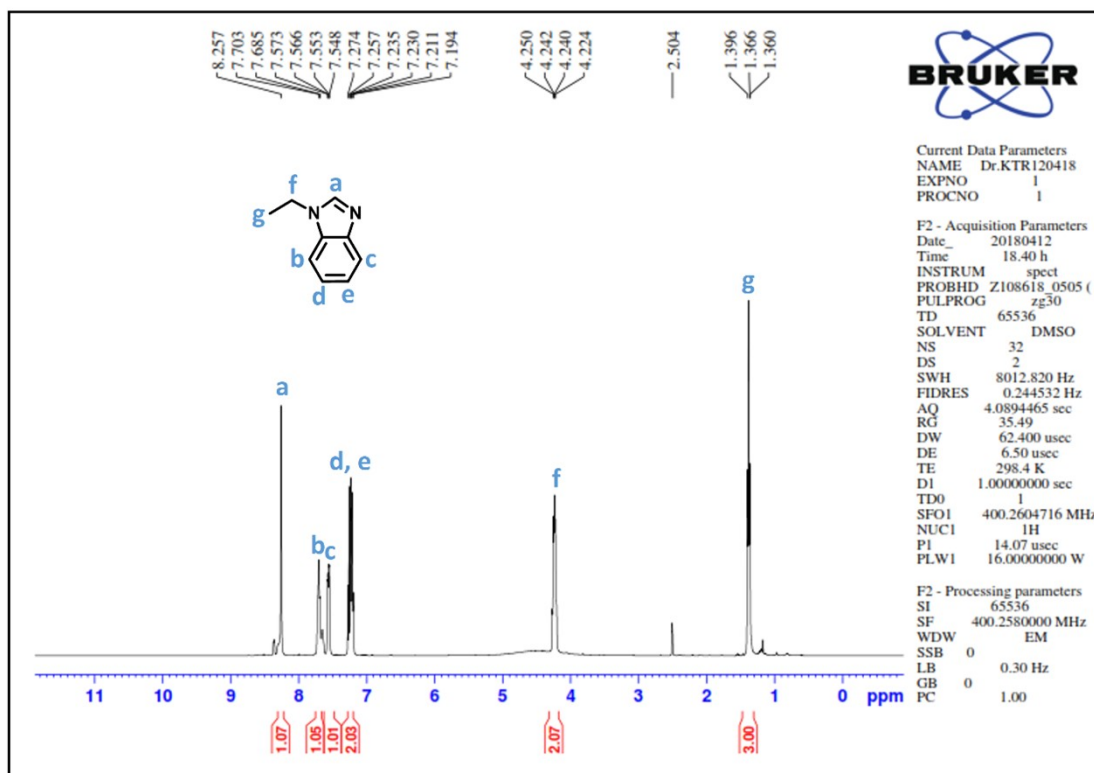

Fig. S3 <sup>1</sup>H NMR spectrum of 1-ethylbenzimidazole (2)

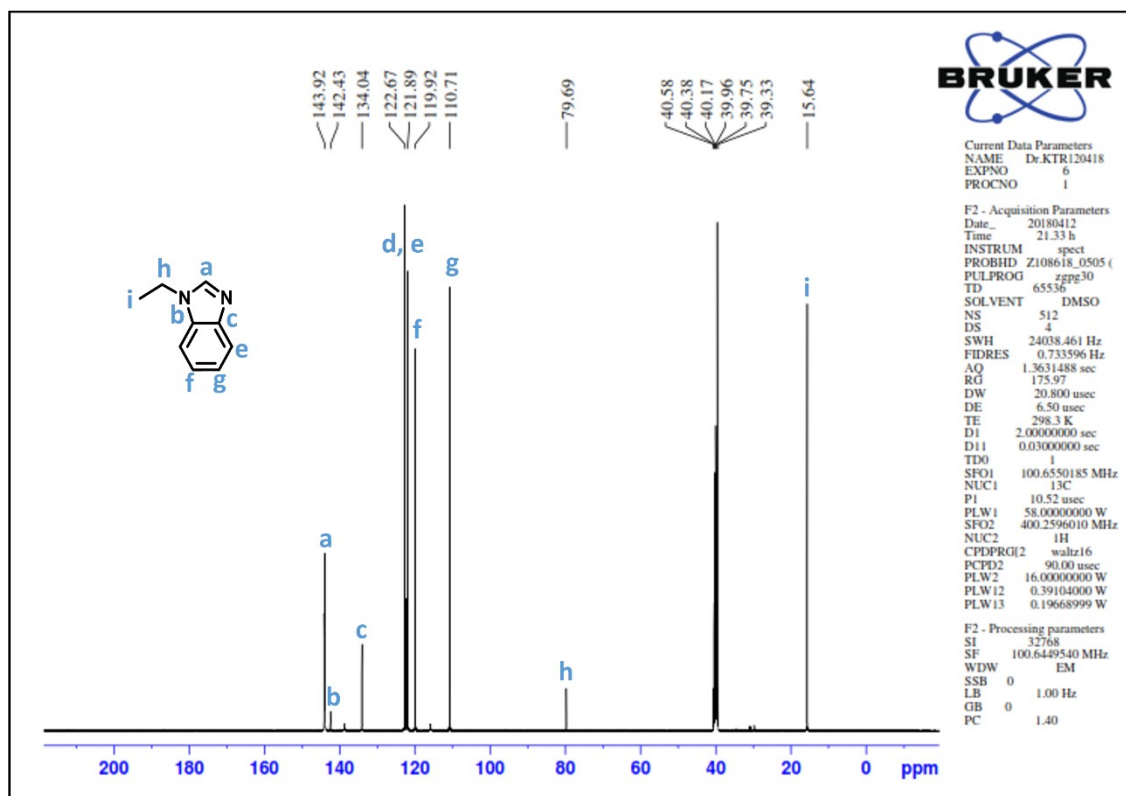

Fig. S4  $^{13}\text{C}$ NMR spectrum of 1-ethylbenzimidazole (2)

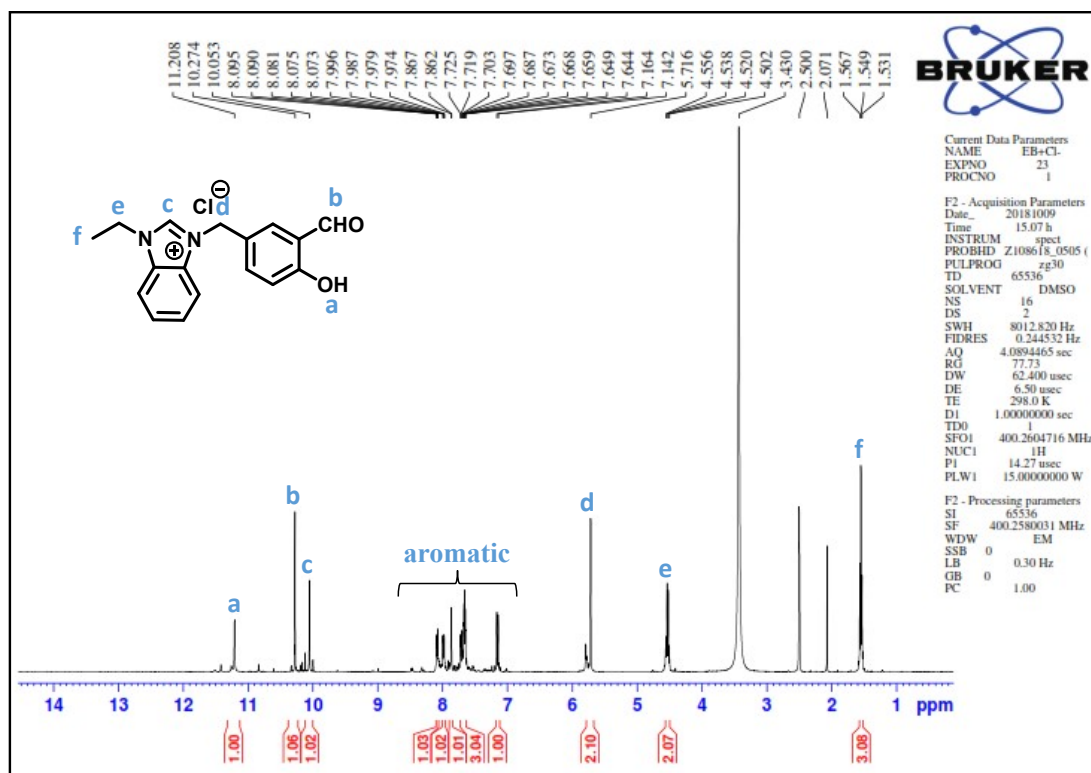

Fig. S5  $^1\text{H}$  NMR spectrum of 1-(3-formyl-4-hydroxybenzyl)-3-ethylbenzimidazolium chloride (3)

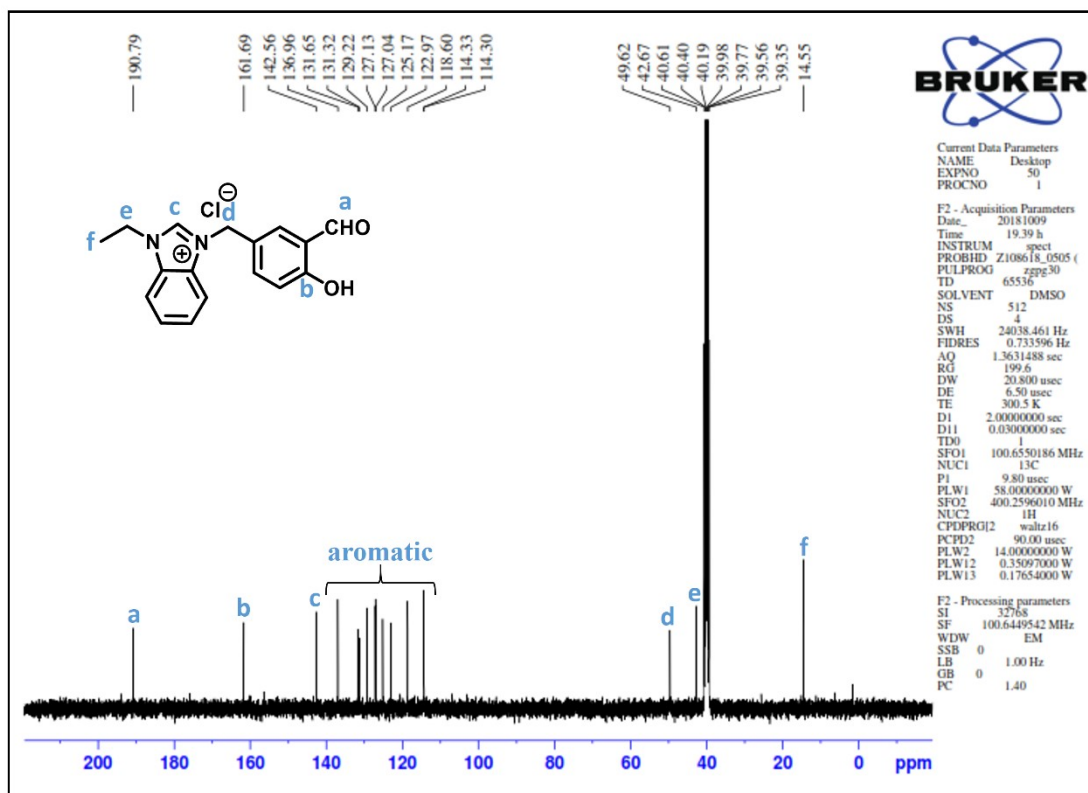

Fig. S6 <sup>13</sup>C NMR spectrum of 1-(3-formyl-4-hydroxybenzyl)-3-ethylbenzimidazolium chloride (3)

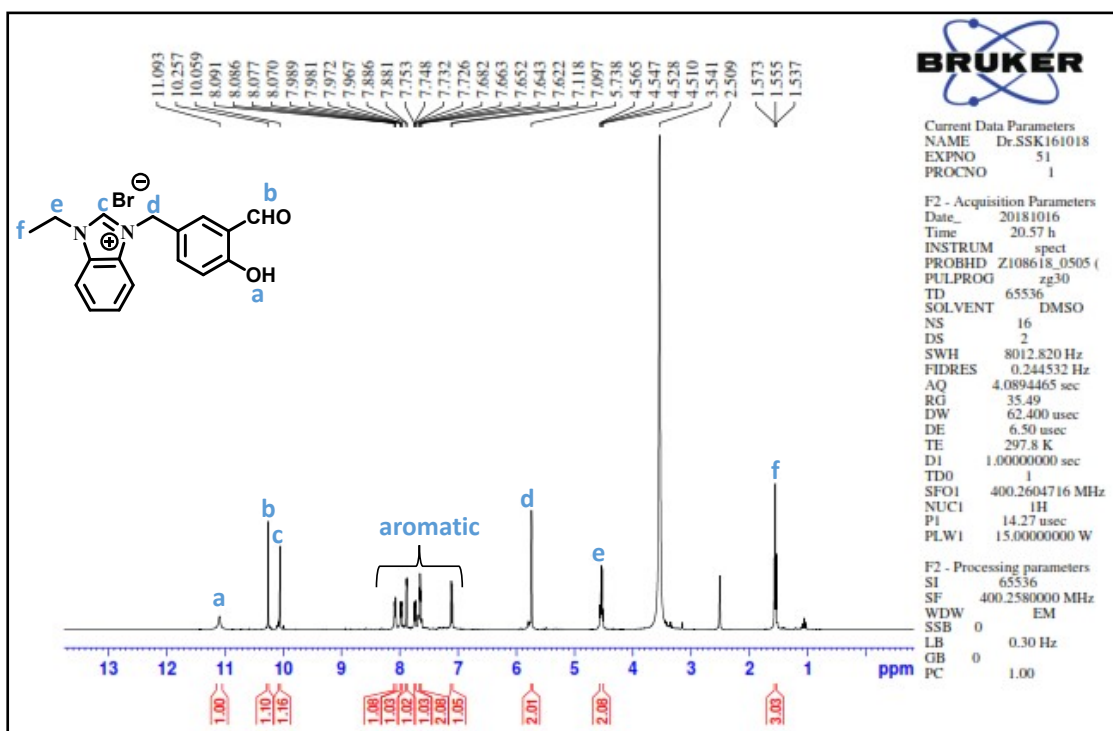

Fig. S7 <sup>1</sup>H NMR spectrum of 1-(3-formyl-4-hydroxybenzyl)-3-ethylbenzimidazolium bromide (4)



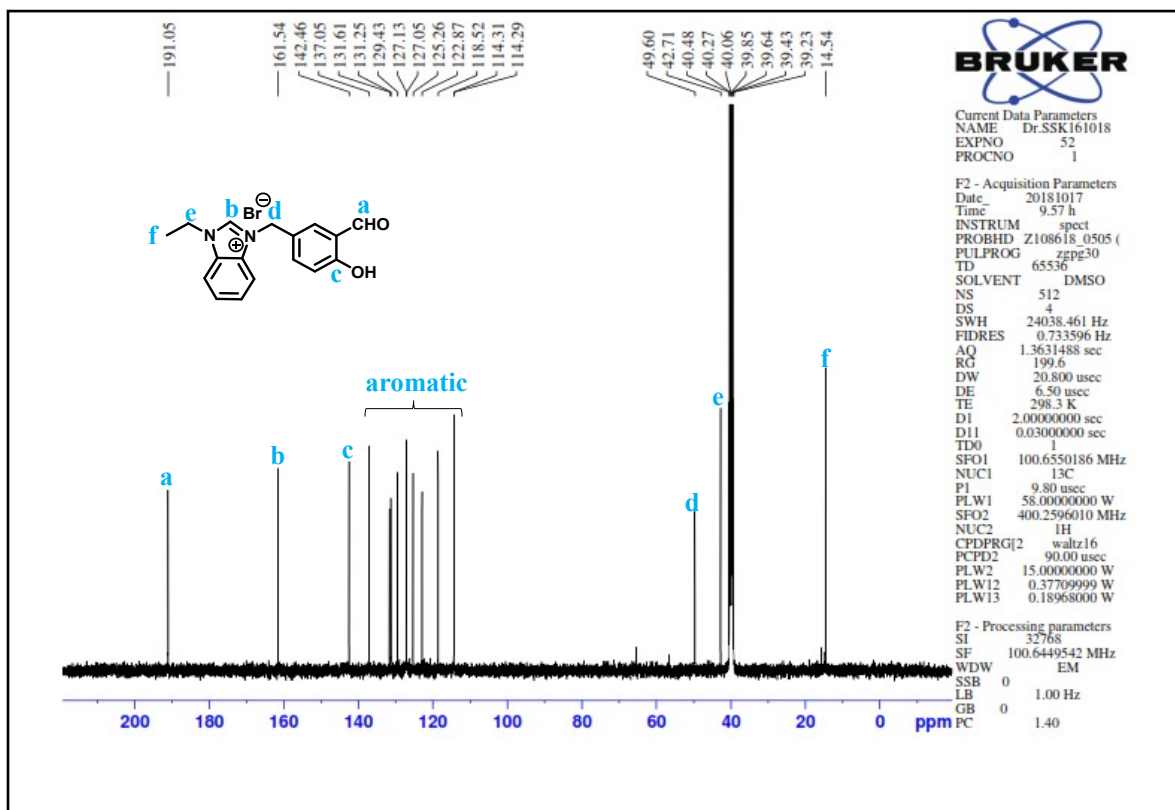

**Fig. S8**  $^{13}\text{C}$  NMR spectrum of 1-(3-formyl-4-hydroxybenzyl)-3-ethylbenzimidazolium bromide (4)

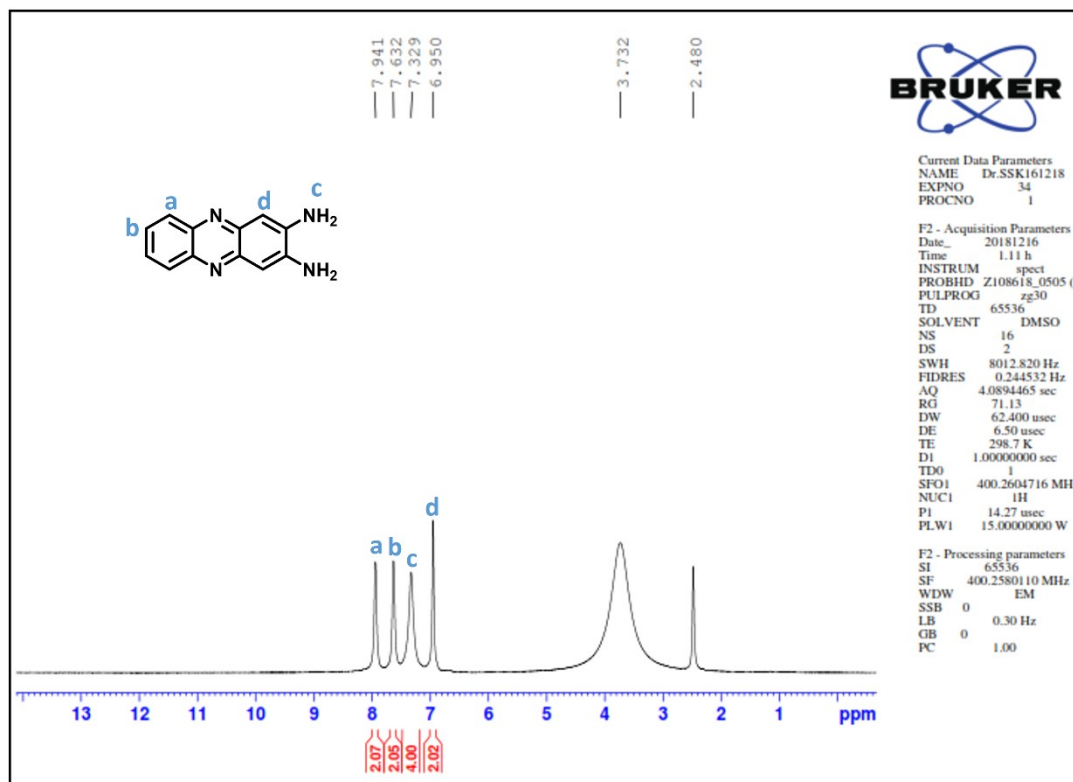

**Fig. S9**  $^1\text{H}$  NMR spectrum of 2,3-diaminophenazine (5)

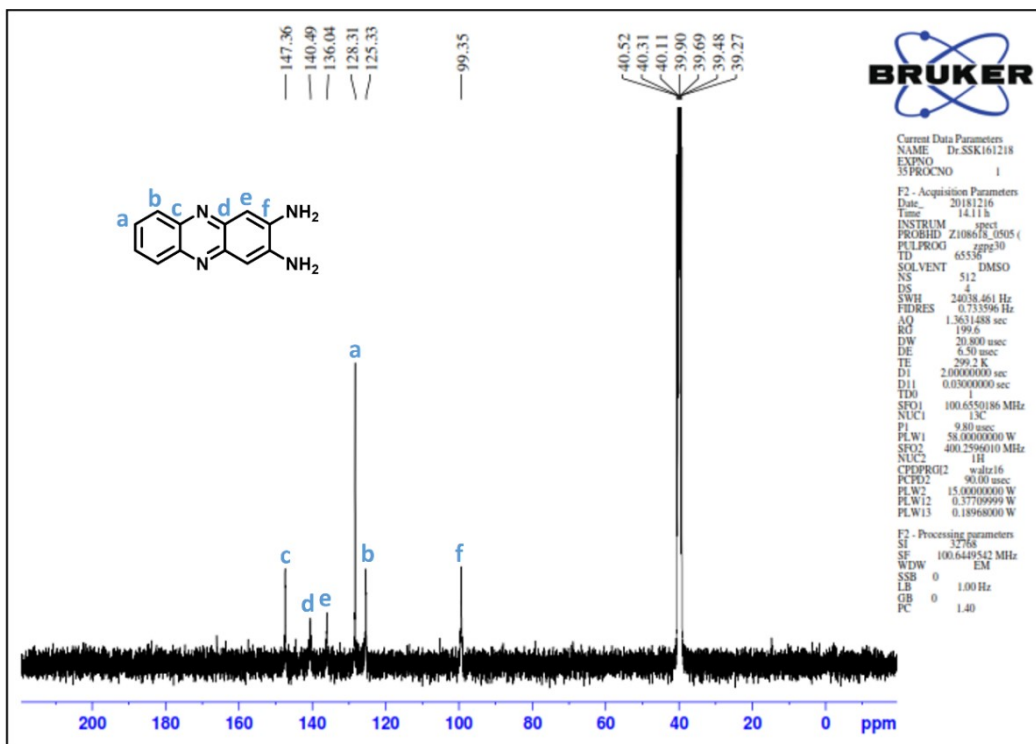

Fig. S10  $^{13}\text{C}$  NMR spectrum of 2,3-diaminophenazine (5)

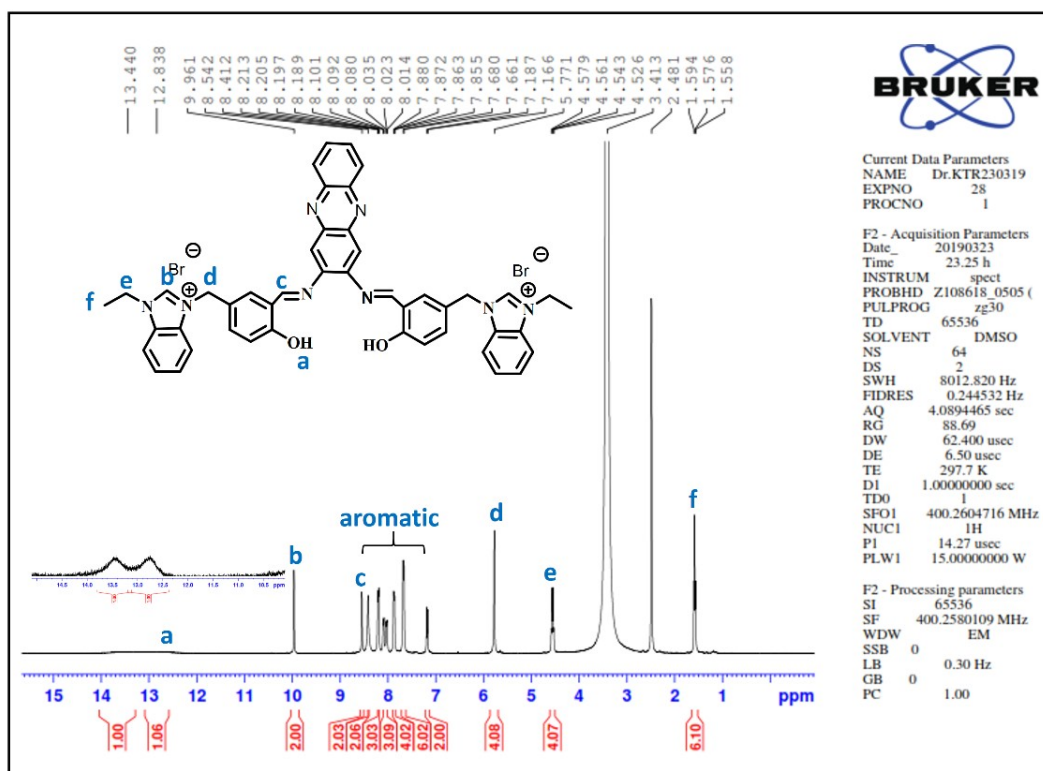

Fig. S11  $^1\text{H}$  NMR spectrum of 3,3'-((((1E,1'E)-(phenazine-2,3-diylbis(azanylylidene))bis(methanylylidene))bis(4-hydroxy-3,1-phenylene))bis(methylene))bis(1-ethyl-1H-benzoimidazol-3-ium) bromide (PS-IL) (6).

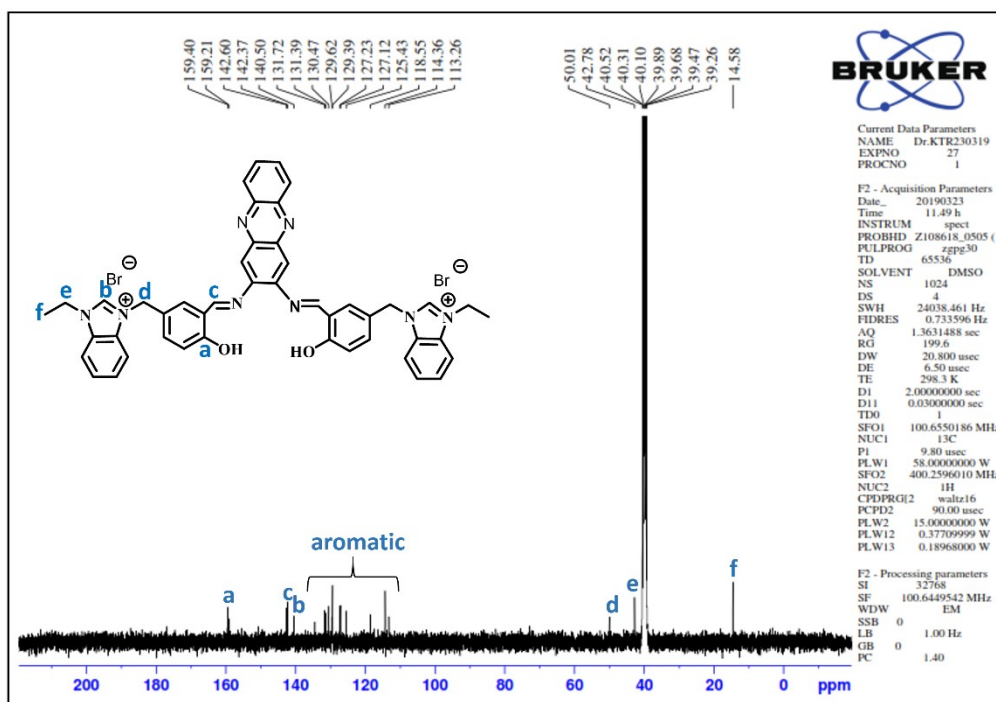

**Fig. S12** <sup>13</sup>C NMR spectrum of 3,3'-((((1E,1'E)-(phenazine-2,3-diylbis(azanylylidene))-bis(methanylylidene))bis(4-hydroxy-3,1-phenylene))bis(methylene))bis(1-ethyl-1H-benzimidazol-3-ium) bromide (PS-IL) (6).

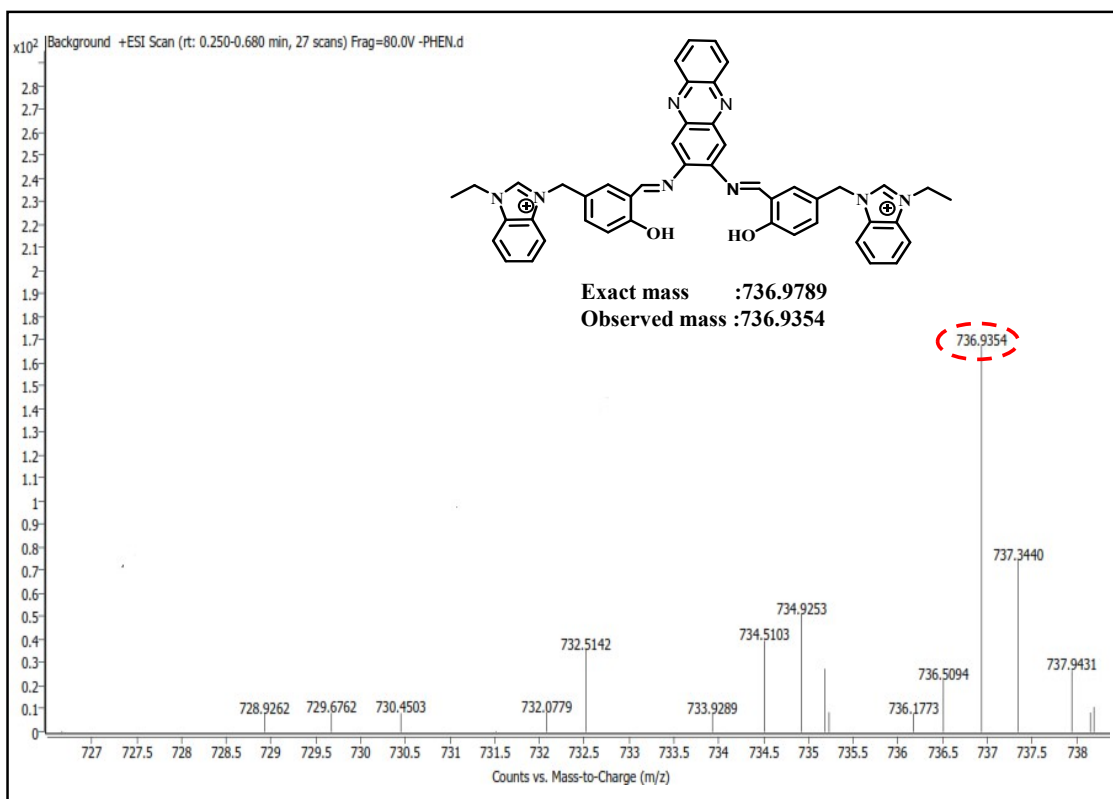

**Fig. S13** ESI-QTOF-MS mass spectrum of [C<sub>46</sub>H<sub>40</sub>N<sub>8</sub>O<sub>2</sub>]<sup>2+</sup> PS-IL.

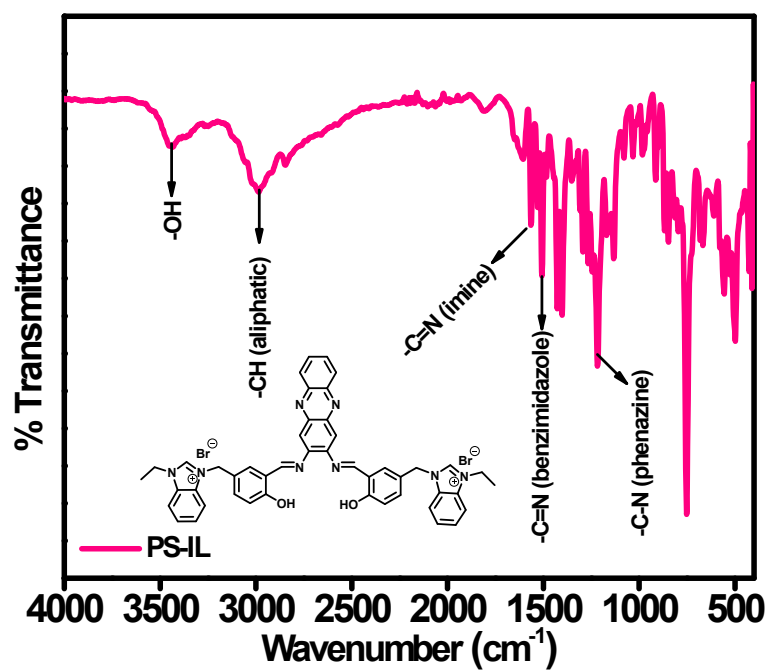

Fig. S14 FTIR spectrum of PS-IL.

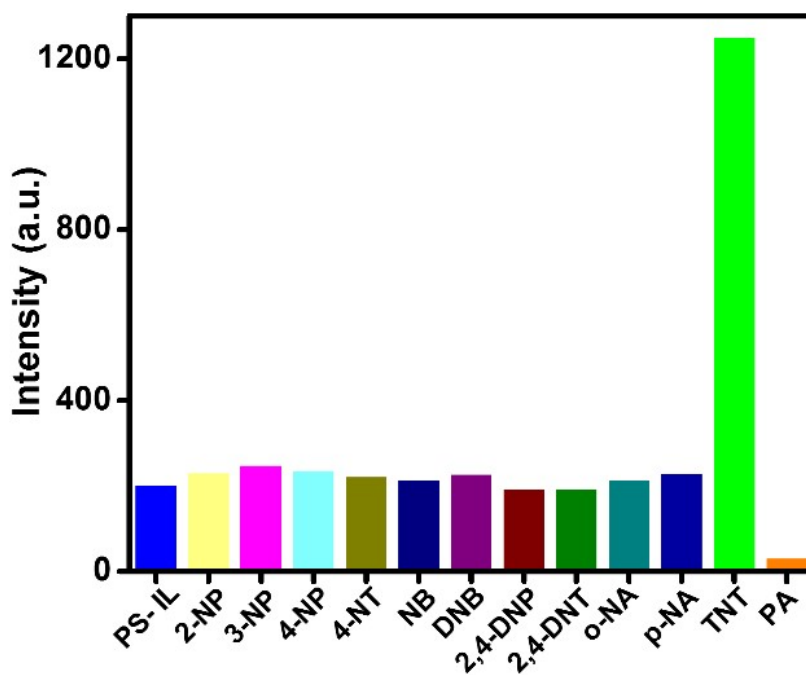

Fig. S15 Selectivity graph of PS-IL towards various nitroaromatics at 1  $\mu$ M concentration.

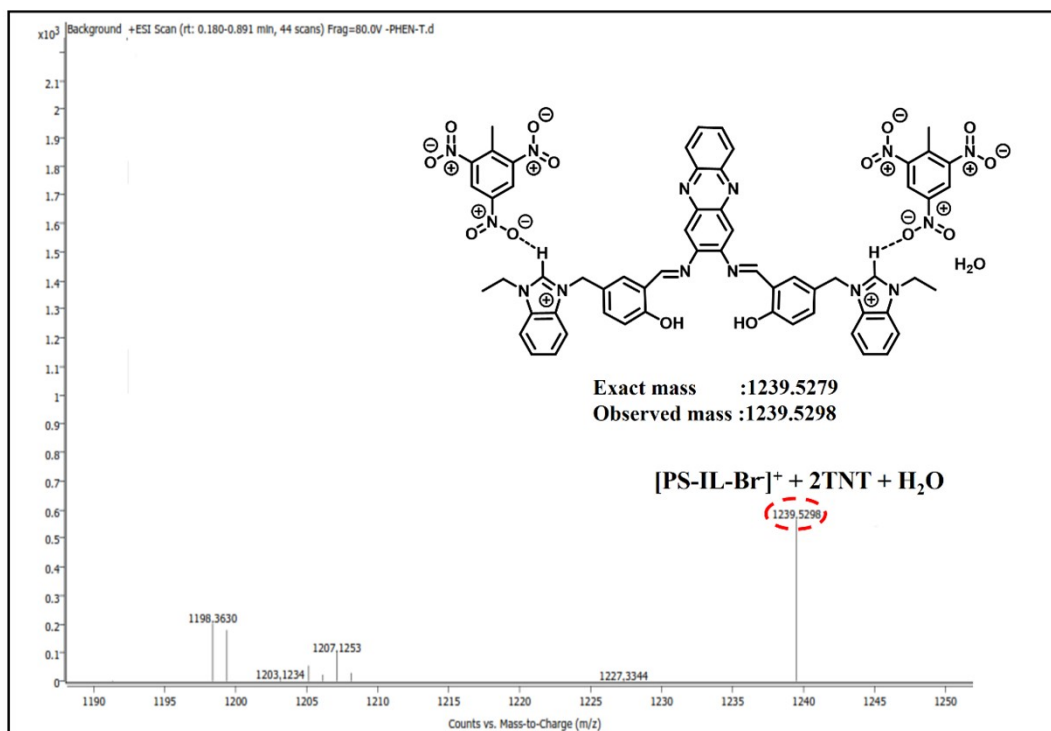

Fig. S16 ESI-QTOF-MS spectrum of PS-IL+TNT.

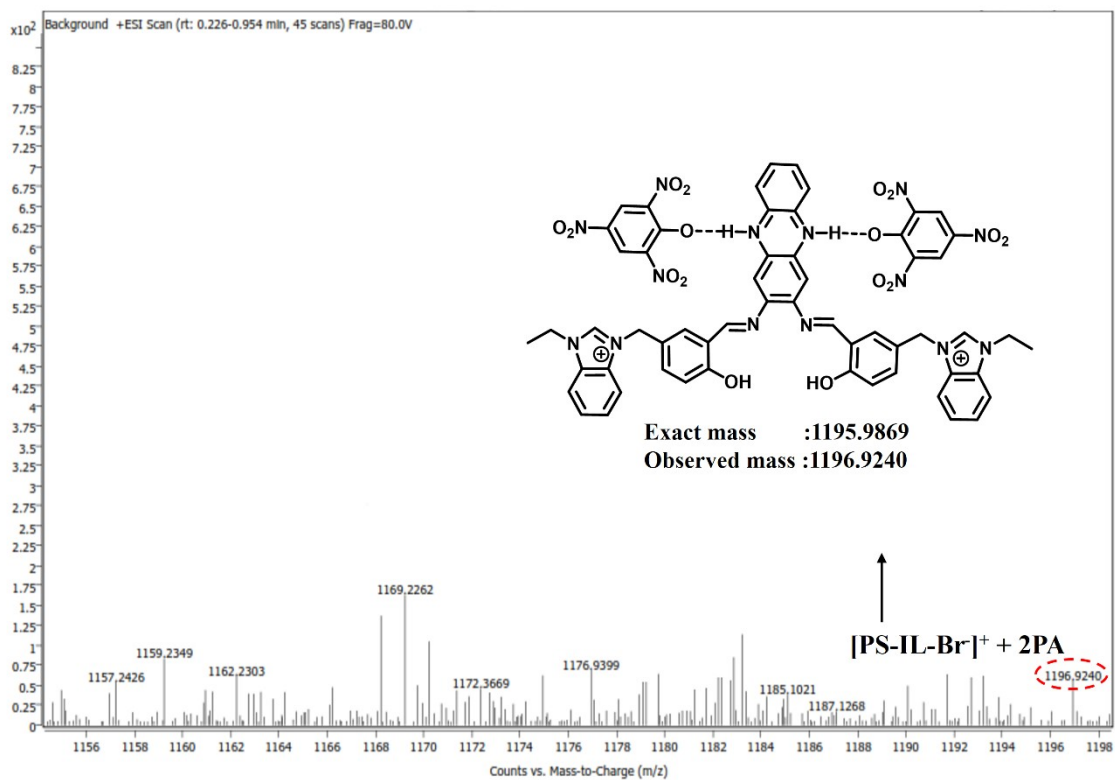

Fig. S17 ESI-QTOF-MS spectrum of PS-IL+PA.

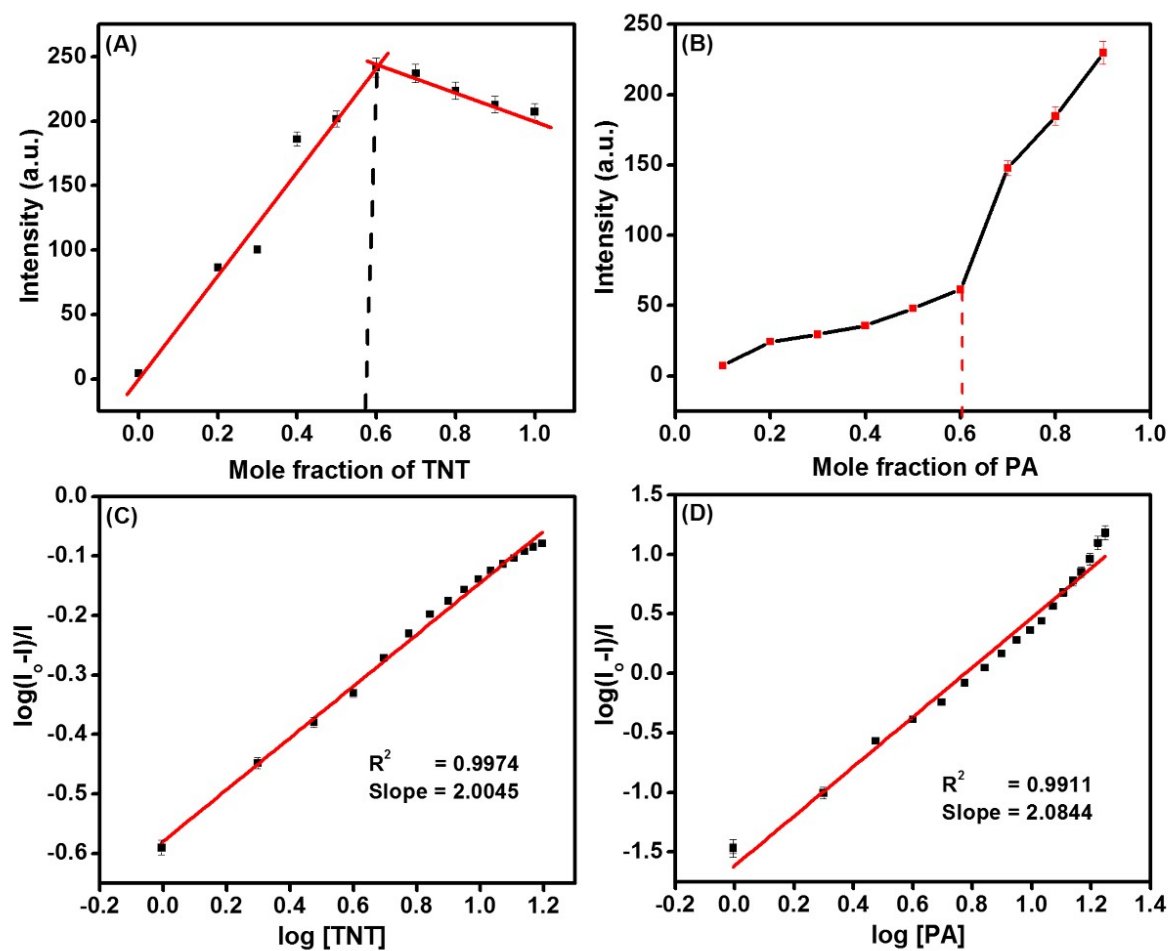

**Fig. S18** Job's plot for PS-IL with (A) TNT and (B) PA. Hill's plot for PS-IL towards (C) TNT and (D) PA.

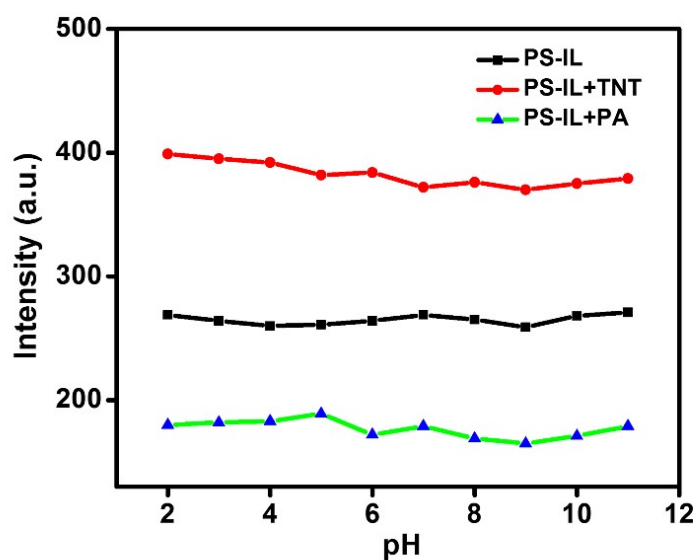

**Fig. S19** pH measurements of PS-IL in the presence and absence of (A) TNT and (B) PA at 562 nm.

## REFERENCES

- (1) K. S. Bejoymohandas, T. M. George, S. Bhattacharya, S. Natarajan, M. L. P. Reddy, AIPE-active green phosphorescent iridium(iii) complex impregnated test strips for the vapor-phase detection of 2,4,6-trinitrotoluene (TNT), *J. Mater. Chem. C*, 2014, **2**, 515–523.
- (2) T. S. Reaction, T. Choice, 441. The Sommelet reaction. Part III. The choice of solvent and the effect of substituents, *J. Chem. Soc.* 1950, 2141–2145.
- (3) M. Murphy, D. Manoj, D. Saravanakumar, K. Thenmozhi, S. Senthilkumar, Water insoluble, self-binding viologen functionalized ionic liquid for simultaneous electrochemical detection of nitrophenol isomers, *Anal. Chim. Acta*, 2020, **1138**, 89–98.
- (4) A. Abdolmaleki, S. Malek-Ahmadi, A partially water-soluble cationic Mn(III)–salphen complex for catalytic epoxidation, *Can. J. Chem.* 2011, **89**, 1202–1206.
